# Supplementary material
Source: MDPI journal article supplement (https://www.mdpi.com/2072-4292/10/10/1510)
Supplement: s1 [file s1]

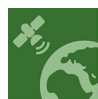

# Diurnal response of Sun-induced Fluorescence and PRI to water stress in maize using a near-surface remote sensing platform

Shan Xu<sup>1,2</sup>, Zhigang Liu<sup>1,2\*</sup>, Liang Zhao<sup>1,2</sup>, Huarong Zhao<sup>3</sup>, Sanxue Ren<sup>3</sup>

<sup>1</sup> State Key Laboratory of Remote Sensing Science, Jointly Sponsored by Beijing Normal University and Institute of Remote Sensing and Digital Earth of Chinese Academy of Sciences, Beijing 100875, China; bnuxushan@gmail.com; zhigangliu@bnu.edu.cn; liangzhao@mail.bnu.edu.cn;

<sup>2</sup> Beijing Engineering Research Center for Global Land Remote Sensing Products, Institute of Remote Sensing Science and Engineering, Faculty of Geographical Science, Beijing Normal University, Beijing 100875, China; bnuxushan@gmail.com; zhigangliu@bnu.edu.cn; liangzhao@mail.bnu.edu.cn

<sup>3</sup> Chinese Academy of Meteorological Sciences, Beijing 100081; 656892rzzr@163.com; 906885281@qq.com

\* Correspondence: zhigangliu@bnu.edu.cn; Tel.: +86-136-5105-1881

## Supplementary Materials:

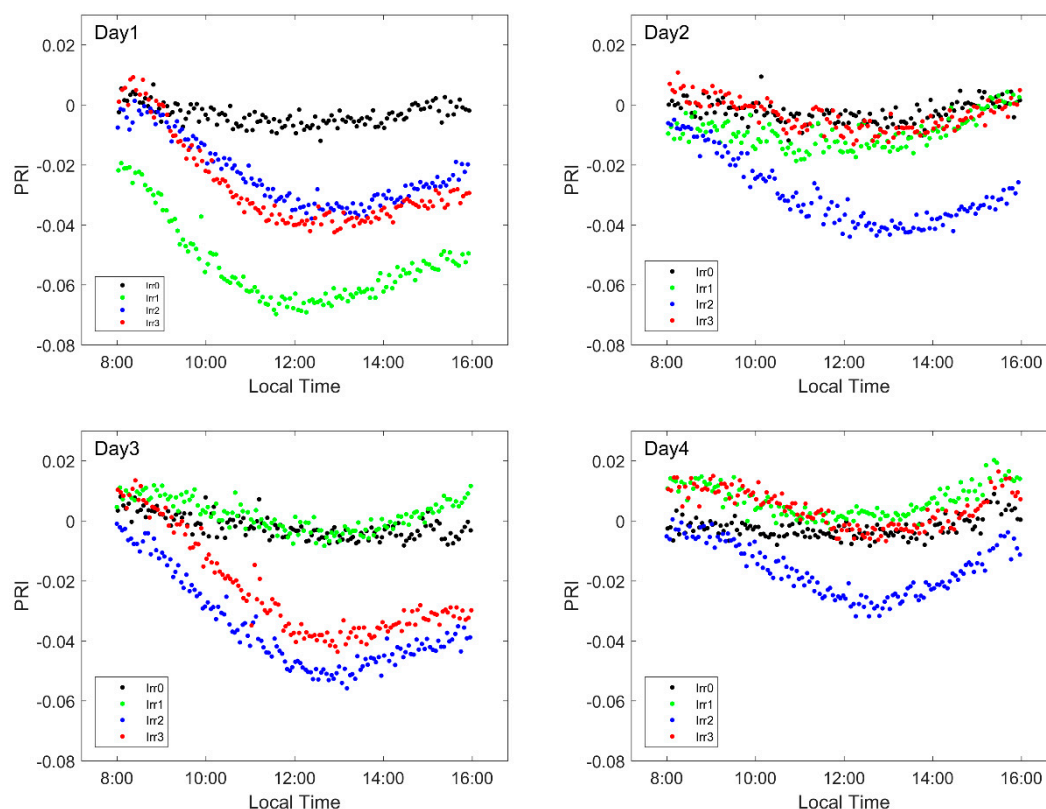

**Figure S1.** Diurnal PRI during experiment, with Day1 to Day4 representing the 4 observation dates (30 Jul., 31 Jul., 3 Aug., 4 Aug.). On the evening of Day1, Irr1 and Irr3 were watered 0.3 m<sup>3</sup> and 0.16 m<sup>3</sup>, respectively. On the evening of Day3, Irr0, Irr1, Irr2 and Irr3 were watered 0.4 m<sup>3</sup>, 0.2 m<sup>3</sup>, 0.3 m<sup>3</sup> and 0.16 m<sup>3</sup>, respectively.

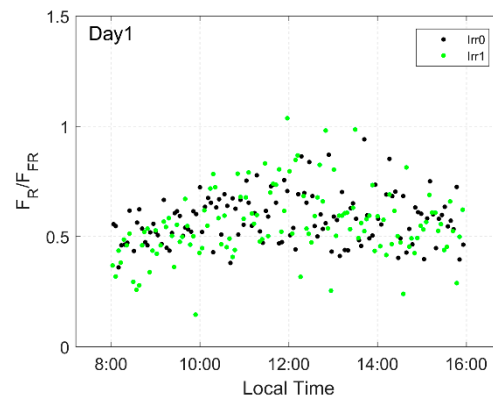

**Figure S2.** The ratio between  $F_R$  and  $F_{FR}$  of Irr0 and Irr1 in Day1.

**Table S1.** The  $R^2$  of fitted data about diurnal  $F_{FR}$  in Figure 2

| R2   | Irr0   | Irr1   | Irr2   | Irr3   |
|------|--------|--------|--------|--------|
| Day1 | 0.6998 | 0.7046 | 0.6406 | 0.5935 |
| Day2 | 0.6211 | 0.5123 | 0.3325 | 0.2696 |
| Day3 | 0.5992 | 0.6966 | 0.5380 | 0.3966 |
| Day4 | 0.8657 | 0.8648 | 0.6955 | 0.6377 |

**Table S2.** The  $R^2$  of fitted data about diurnal  $F_R$  in Figure 3

| R2   | Irr0   | Irr1   | Irr2   | Irr3   |
|------|--------|--------|--------|--------|
| Day1 | 0.7873 | 0.6515 | 0.6636 | 0.7167 |
| Day2 | 0.5800 | 0.7084 | 0.4764 | 0.5639 |
| Day3 | 0.7970 | 0.9016 | 0.6370 | 0.7126 |
| Day4 | 0.8108 | 0.8277 | 0.6794 | 0.7867 |
